# Supplementary material
Source: PubMed Central journal article supplement (PMC3412143)
Supplement: NIHMS364004-supplement-3.pdf [file NIHMS364004-supplement-3.pdf]

| peptide  | deacetylation<br>by SIRT1 |
|----------|---------------------------|
| H2BK12Ac | +                         |
| H2BK15Ac | +                         |
| H2BK20Ac | +                         |
| H3K9Ac   | +                         |
| H3K18Ac  | +                         |
| H4K5Ac   | +                         |
| H4K8Ac   | +                         |
| H4K12Ac  | +                         |

**Supplementary Table 1. SIRT1 deacetylates multiple histone peptides *in vitro*.** Deacetylase reactions were performed in the absence or presence of recombinant SIRT1 protein and NAD<sup>+</sup>, and deacetylation was detected by mass spectrometry. Table summarizes positive substrates identified for SIRT1.

|                        | Number of reads<br>(factor) | Number of peaks<br>(factor) | Number of top 40% peaks<br>overlapping with other<br>replicate (percentage) |
|------------------------|-----------------------------|-----------------------------|-----------------------------------------------------------------------------|
| ENCODE<br>requirements | factor < 2                  | factor < 2                  | percentage > 80                                                             |
| SIRT7 rep1             | 6,232,566 (0.94)            | 496 (1.56)                  | 102 (80.3)                                                                  |
| SIRT7 rep2             | 6,599,572 (1.06)            | 317 (0.64)                  | 113 (89.0)                                                                  |

**Supplementary Table 4. Reproducibility analysis of the two SIRT7 ChIP-sequencing replicates.** Table summarizing read and peak overlap between SIRT7 ChIP-sequencing replicates 1 and 2 (rep1 and rep2). According to the NIH guideline, the longer list (496 peaks) was trimmed to the length of the shorter list (317 peaks) in the overlap analysis. ChIP-sequencing peaks were identified using MACS with p-value cutoff 1e-6. Factors are with respect to the opposite replicate.

|                                        | SIRT7 ChIP-seq rep1 | SIRT7 ChIP-seq rep2 | Common peaks between rep1 and rep2 | SIRT7 pooled |
|----------------------------------------|---------------------|---------------------|------------------------------------|--------------|
| Number of peaks                        | 496                 | 317                 | 209                                | 276          |
| Number of peaks containing ELK4 motif  | 251                 | 224                 | 109                                | 159          |
| Percent of peaks containing ELK4 motif | 50.6                | 70.7                | 52.2                               | 57.6         |

**Supplementary Table 5. Overlap between SIRT7 ChIP-sequencing peaks and the ELK4-consensus motif.**

Analysis of ChIP-sequencing data pooled from two replicates, the individual replicates, or the peaks in common, yielded very similar numbers with significant enrichment for ELK4 motif containing peaks. Analysis of the pooled data was performed using the highly stringent p-value cutoff  $1e-8$ . Separate analysis of the individual replicates, using a p-value cutoff of  $1e-6$ , identified more peaks: 496 and 317 peaks for replicates 1 and 2, respectively, and 209 peaks were common to the two replicates.

ELK4 motif

| position | 1    | 2    | 3    | 4    | 5    | 6    | 7    | 8    | 9    |
|----------|------|------|------|------|------|------|------|------|------|
| A        | 0.80 | 0.00 | 0.00 | 0.00 | 0.00 | 1.00 | 0.80 | 0.20 | 0.05 |
| C        | 0.05 | 1.00 | 1.00 | 0.00 | 0.00 | 0.00 | 0.00 | 0.05 | 0.30 |
| G        | 0.10 | 0.00 | 0.00 | 1.00 | 1.00 | 0.00 | 0.00 | 0.75 | 0.00 |
| T        | 0.05 | 0.00 | 0.00 | 0.00 | 0.00 | 0.00 | 0.20 | 0.00 | 0.65 |

SIRT7 motif

| position | 1    | 2    | 3    | 4    | 5    | 6    | 7    | 8    |
|----------|------|------|------|------|------|------|------|------|
| A        | 0.05 | 0.05 | 0.03 | 0.83 | 0.77 | 0.14 | 0.03 | 0.07 |
| C        | 0.69 | 0.03 | 0.05 | 0.09 | 0.04 | 0.08 | 0.21 | 0.11 |
| G        | 0.19 | 0.88 | 0.86 | 0.03 | 0.14 | 0.58 | 0.06 | 0.74 |
| T        | 0.07 | 0.03 | 0.06 | 0.05 | 0.04 | 0.21 | 0.71 | 0.07 |

**Supplementary Table 6. ELK4 and SIRT7 consensus motifs.** Matrix of JASPAR motif MA0076.1 ELK4 as well as SIRT7 motif generated by STAMP. The numeric values indicate the relative weight of each nucleotide [ACGT] at each position of the motif on a scale of 0-1.

| <b>Antibodies</b> | <b>Source</b> | <b>Catalog #</b> |
|-------------------|---------------|------------------|
| beta-tubulin      | Upstate       | 05-661           |
| E1A               | Abcam         | ab33183          |
| ELK1              | Epitomics     | 1277-1           |
| ELK4              | Sigma         | HPA028863        |
| FLAG M2           | Sigma         | F3165            |
| GABP $\alpha$     | Abcam         | ab55052          |
| H2A               | Abcam         | ab18255          |
| H2AK5Ac           | Abcam         | ab45152          |
| H3                | Abcam         | ab1791           |
| H3K14Ac           | Abcam         | ab52946          |
| H3K18Ac           | Abcam         | ab1191           |
| H3K23Ac           | Abcam         | ab46982          |
| H3K56Ac           | Epitomics     | 2134-1           |
| H3K9Ac            | Abcam         | ab4441           |
| H4                | Abcam         | ab7311           |
| H4K16Ac           | Abcam         | ab23352          |
| H4K8Ac            | Abcam         | ab15823          |
| HA-tag            | Abcam         | ab9110           |
| NME1              | Sigma         | WH0004830M2      |
| p53               | Calbiochem    | OP43             |
| p53 K382Ac        | Abcam         | ab75754          |
| RPS14             | Abcam         | ab50390          |
| RPS20             | Abcam         | ab74700          |
| SIRT1             | Santa Cruz    | sc-15404         |
| SIRT7             | ref. 8        | -                |

Supplementary Table 7. Antibodies used in this study.

| Gene                  | Primer  | Sequence                    |
|-----------------------|---------|-----------------------------|
| <i>COPS2</i>          | forward | gtgcatgatgaggaggact         |
|                       | reverse | cacatttggctcggagttacta      |
| <i>CCNT1</i>          | forward | cttacttcatggcaaccaacag      |
|                       | reverse | cttgcaagccagggtgaatg        |
| <i>ELK4</i>           | forward | ctcgagtttccagcgtgag         |
|                       | reverse | cagggtgatagcactgtccat       |
| <i>FAF1</i>           | forward | gaagtccagcgggagtacaa        |
|                       | reverse | aaggtcatacacatttctctttacctc |
| <i>GAPDH</i>          | forward | agccacatcgctcagacac         |
|                       | reverse | gccaatacagaccaaattcc        |
| <i>GPR108</i>         | forward | caggaacaaccgtagctg          |
|                       | reverse | ggaaccagagtccgtcat          |
| <i>MORG1</i>          | forward | cgggaagggtgttcttctgg        |
|                       | reverse | actgcaccacaccggaac          |
| <i>NME1</i>           | forward | cagccggagttcaaacctaa        |
|                       | reverse | gcaatgaaggtagctcaca         |
| <i>RPS7</i>           | forward | tcgagagatttgggtctct         |
|                       | reverse | ggcgctcgaactgaacat          |
| <i>RPS14</i>          | forward | tcgttctggtctcagaagg         |
|                       | reverse | cctttcgaggtagccatctt        |
| <i>RPS20</i>          | forward | agggctgaggatttttggtc        |
|                       | reverse | gggtgtttttccggtagct         |
| <i>SIRT7</i> (ref. 8) |         |                             |

| Target                     | Primer  | Sequence                  |
|----------------------------|---------|---------------------------|
| <i>COPS2</i> promoter      | forward | cgaatcagctacaagtgcagataa  |
|                            | reverse | cgcttccagtcctctt          |
| <i>GAPDH</i> promoter      | forward | gacctccgtgcagaaacc        |
|                            | reverse | ctggctcctggcatctct        |
| <i>NME1</i> promoter       | forward | ccgtaatacttggtctcga       |
|                            | reverse | gaatagacctgcatgaagtgagg   |
| <i>RPS7</i> promoter       | forward | cggctgaaagtaactcttgc      |
|                            | reverse | gctgtggacagggaaatttaac    |
| <i>RPS14</i> promoter      | forward | acaggaggacggattgagc       |
|                            | reverse | acggggtctccctgtgtt        |
| <i>RPS20</i> promoter      | forward | aagttctttctttttgaggaagacg |
|                            | reverse | gaacagcggtagtcagga        |
| <i>TIMM9</i> promoter      | forward | atgtccggagtttgtttcca      |
|                            | reverse | aagctaagcgtctctggtg       |
| <i>TMEM71</i> promoter     | forward | agcccatctaatgctcgat       |
|                            | reverse | ctagcctgggtgtctgctt       |
| <i>UBE2N</i> promoter      | forward | cgtgccttccaggaacttag      |
|                            | reverse | gcccttaacacattggattgtaa   |
| $\gamma$ -tubulin promoter | forward | acgggttctcatcatgtttgtt    |
|                            | reverse | ggcagatcccctgaggtc        |

**Supplementary Table 8. PCR primers used in this study.** Sequences of PCR primers used for gene expression (top panel) or ChIP (bottom panel) analysis.
